# Supplementary material for: Exploring the optoelectronic properties of SnSe: a new insight
Source: Royal Society of Chemistry journal article supplement (doi:10.1039/d2tc03799h), 2022-01-01
Supplement: d2tc03799h1.pdf [file d2tc03799h1.pdf]

## Exploring the optoelectronic properties of SnSe: A new insight

Manoj Kumar<sup>1,2,3</sup>, Sanju Rani<sup>1,2</sup>, Pargam Vashistha<sup>1,4</sup>, Govind Gupta<sup>1,4</sup>, Xu Wang<sup>3\*</sup> and  
V.N. Singh<sup>1,2\*</sup>

<sup>1</sup>Academy of Scientific and Innovative Research (AcSIR), Ghaziabad, Uttar Pradesh- 201002, India

<sup>2</sup>Indian Reference Materials (BND) Division, CSIR-National Physical Laboratory, Dr. K. S. Krishnan Marg, New Delhi-110012, India

<sup>3</sup>School of Engineering, RMIT University, VIC 3000 Australia

<sup>4</sup>Sensor Device Metrology Division, CSIR-National Physical Laboratory, Dr. K. S. Krishnan Marg, New Delhi 110012, India

**Corresponding author:** [singhvn@nplindia.org](mailto:singhvn@nplindia.org) (VNS) and [xu.wang@rmit.edu.au](mailto:xu.wang@rmit.edu.au) (Xu Wang)

Supplementary Information-

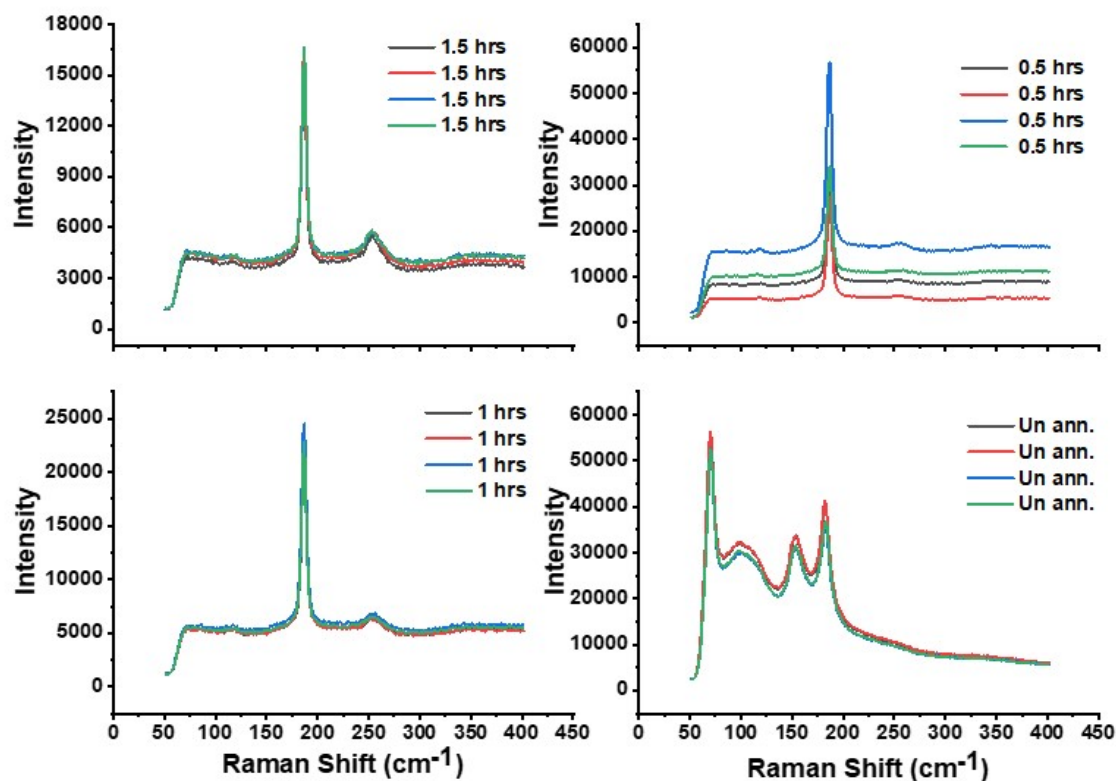

**Figure S1 Raman spectra at randomly selected points on the film of the samples annealed at different times.**

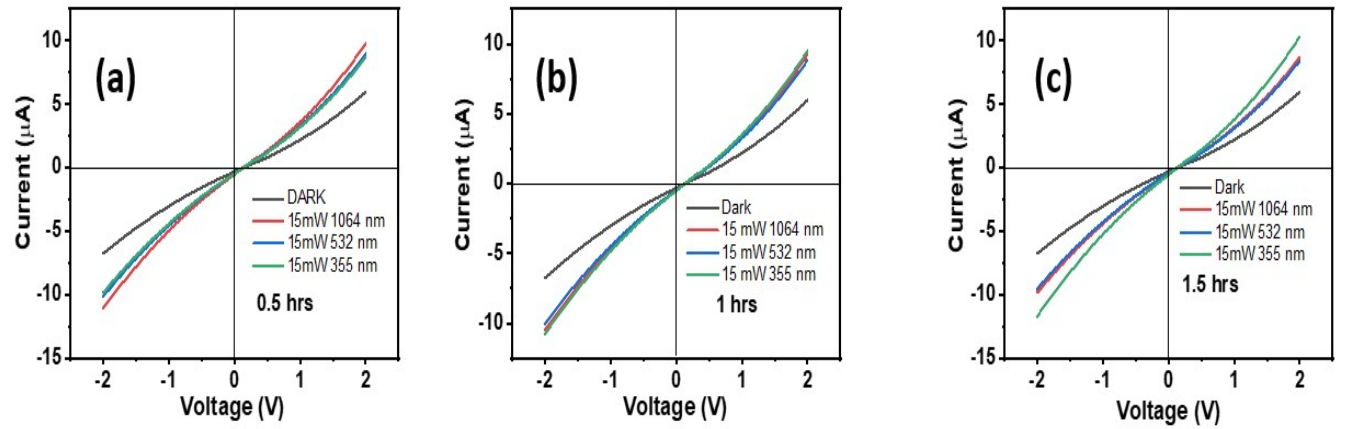

**Figure S2. I-V of the devices under different conditions.**

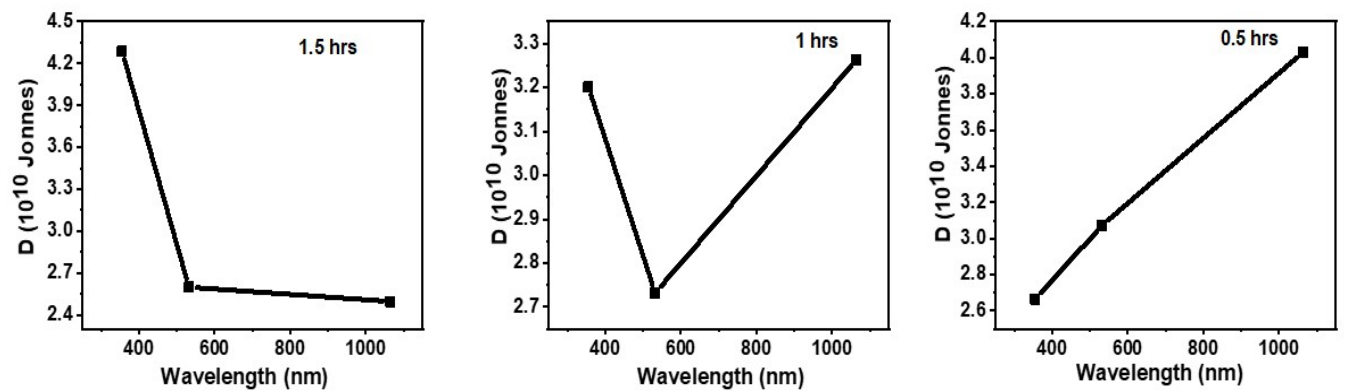

**Figure S3. Detectivity of the devices**

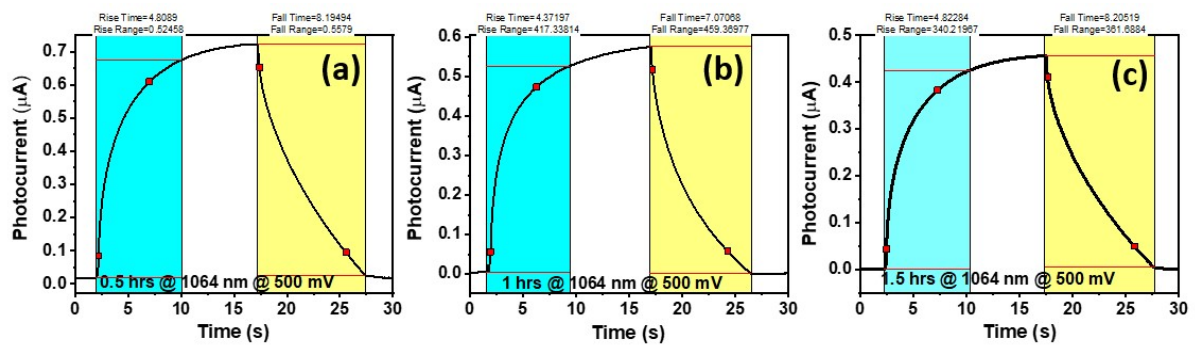

**Figure S4. Rise and decay time fitting at 1064 nm of (a) 0.5, (b) 1, and (c) 1.5 hrs annealed devices.**

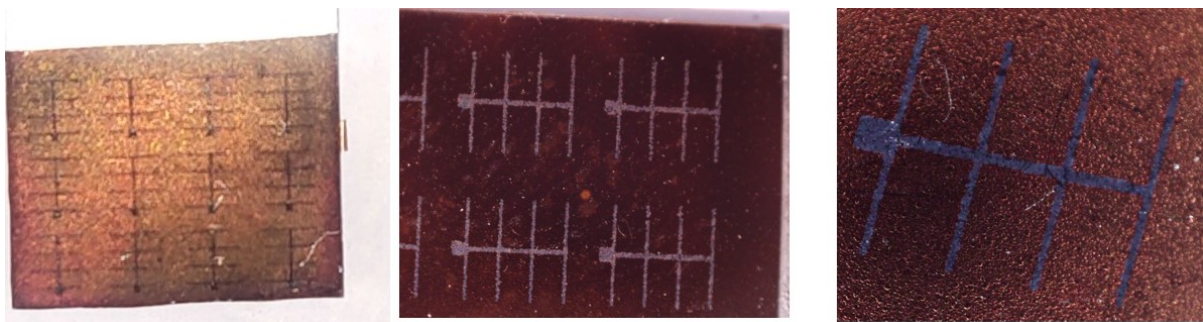

**Figure S5.** Images of an actual solar cell device of SnSe annealed at 300 °C for one hour (having Ag silver contacts on the front face made using masking).

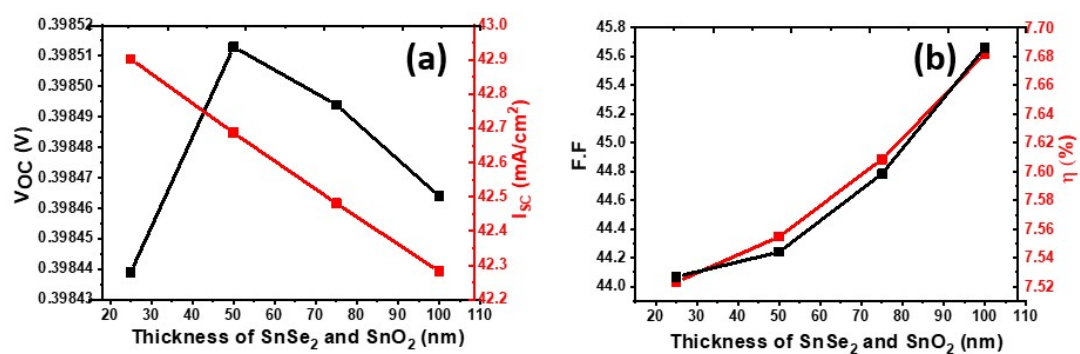

**Figure S6.** Effect of thickness of SnSe<sub>2</sub> and SnO<sub>2</sub> on the parameters, Voc, Jsc (a), FF, and efficiency ( $\eta$ ) (b) of SnSe-based solar device.

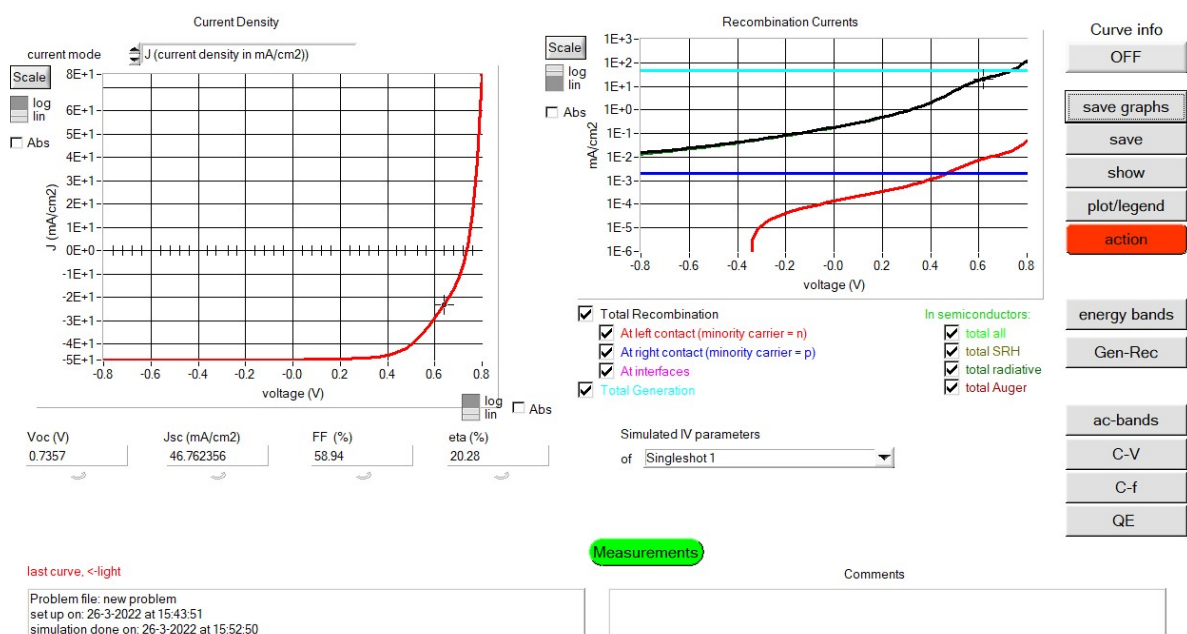

**Figure S7.** IV panel of the SCAPS-1D software shows efficiency of 20.28 %, with a back contact of 5.3 eV.
